# Supplementary material for: A Systematic Review of Research on the Meaning, Ethics and Practices of Authorship across Scholarly Disciplines
Source: PLoS One. 2011 Sep 8;6(9):e23477. doi: 10.1371/journal.pone.0023477 (PMC3169533; doi:10.1371/journal.pone.0023477)
Supplement: Table S6 — Results of studies addressing authorship in researcher – student/non-researcher collaborations. (DOC) [file pone.0023477.s006.doc]

**Table S6.** Authorship in researcher – student/non-researcher collaborations*

| **Research field** | **Reference** | **Study population** | **Outcome** | **Result (prevalence, score, P-value, odds)** |
| --- | --- | --- | --- | --- |
| Social sciences | Spiegel, 97011 | Psychologists in USA | Opinion on deserved authorship for:  - paid consultant who makes substantial contributions  - qualified sub-doctoral assistant who makes substantial contributions  - student assistant who collected and statistically analyzed data  - volunteer assistant who helped with the study  - service chief, program administrator, head of the lab only | 45%  91%  19%  4%  14%, 18%, 11% |
| Preferred outcome for student-professor collaboration (both designed the study, student collected and analyzed data and wrote article):  - first authorship for student  - first authorship for professor  - random decision | 58%  32%  4% |
| Health | Werley,a 198113 | Nursing professionals in USA | Opinion on deserved authorship for:  - paid consultant who makes substantial contributions  - qualified subdoctoral assistant who makes substantial contributions  - student assistant who collected and statistically analyzed data  - volunteer assistant who helped with the study  - service chief, program administrator | 28%  78%  14%  3%  15%, 12% |
| Preferred outcome for student-professor collaboration (both designed the study, student collected and analyzed data and wrote article):  - first authorship for student  - acknowledgment for professor  - first authorship for professor | 52%  30%  14% |
| Opinion on deserved authorship:  - researchers vs. others for superficial supervision of doctoral thesis  - doctoral students vs. others on no recognition for volunteer research team member  - doctoral students vs others on professor’s authorship after reading article and making no comments or few editorial revisions | 19% vs. 10%  0% vs. 4%  11% vs. 6%, 20% vs. 12% |
| Health | Waltz,a 198516 | Health professionals in nursing in USA | Opinion on deserved authorship for :  - paid research assistant who makes substantial contributionsb  - paid or volunteer subdoctoral personnel if they make same contributions as doctoral fellowsb  - having a lab where student works but not contribution  - professor asked by student to be author without contribution | 85%  85%  15%  4% |
| Health | Gay,a 198717 | Educators in nursing in USA | In faculty-doctoral student collaboration, authorship should be decided before study | 78% |
| Volunteers who make similar contributions as others deserve authorship | 85% |
| Footnote for volunteer graduate student who helps with statistical analysis | 77% |
| No authorship for faculty who provide minimal consultation to student work | 50% |
| Faculty who makes little or no contribution to student research should not share authorship | 80% |
| Faculty who serve as academic advisors to student project should be acknowledged in footnote | 55% |
| Publication from dissertation is an independent research effort of student | 67% |
| When student and faculty collaborate, student is the first author on manuscript | 65% |
| When student updates literature review, analyzes data and writes manuscript of a faculty-designed study, coauthorship should be alphabetical | 82% |
| When students cannot fulfil research commitment, faculty receives first authorship even if prior agreement was that students are first authors | 56% |
| Social sciences | Costa, 199219 | Psychology students and faculty in USA | Faculty vs. students views of authorship order for published dissertation with different level of faculty input:c  High faculty input – student first author, faculty second  High faculty input – faculty first author, student second  Low faculty input – student first author, faculty second  Low faculty input – faculty first author, student second | 65.2% vs. 46.3%  17.4% vs. 46.3%  20.0% vs. 42.0%  0 vs. 3.2% |
| Social sciences | Goodyear, 199220 | Editorial board members and authors of psychology journals in USA | Reported critical incidents related to student research:d  1) taking other’s ideas or manuscripts  2) failure to give warranted credit  3) giving unwarranted credit |  |
| Multidisciplinary | Brown-Wright, 199732 | Graduate assistants and faculty members in USA | Assistance in analysis of research data warrants authorship for graduate assistant – faculty vs. assistants | 88% vs. 96% |
| Multidisciplinary | Rose, 198840 | Graduate students in physics, biological, engineering and social sciences in USA | Opinion of men vs. women that professor as first author on manuscript if from dissertation (mean±SE):e | 1.8±0.2 vs. 1.6±0.2 |
| Professor submitting manuscript without discussing authorship with student (mean±SE): e  - unethical in any case (men vs. women)  - unethical if dissertation  - unethical if student did work | 2.2±0.1vs. 1.8±0.1  1.9±0.1  1.5±0.1 |
| Perceived reporting of authorship problems (mean±SD):f  - likelihood to talk to the dean, file complaint, contact journal  - effectiveness of talking to the dean, filing complaint, contacting journal  - consequences of talking to the dean, filing complaint, contacting journal | 2.7±1.6, 2.1±1.4, 1.6±1.1  3.9±1.8, 3.75±1.9, 3.1±2.0  5.4±1.6, 5.7±1.7, 6.0±1.7 |
| Social science | Louw, 199944 | Academic and non-academic psychologists and masters’ degree students in South Africa | Choice of first authorship by academics/ non-academics/ and students:  - supervisor first author when supervisor initiates project, both student and supervisor active  - student first author when student initiates project, both student and supervisor active  - supervisor first author when both jointly initiate project, both are active, student writes first draft but loses interest after several manuscript submissions  - supervisor first author when both active, student writes dissertation, supervisor writes manuscript and adds literature | 75%/ 73%/ 84%  82%/87%/92%  79%/87%/90%  75%/80%/79% |
| Social science | Bartle, 200048 | Faculty and students from psychology departments in USA | Agreement of faculty vs. students with student-faculty collaboration:g  - students are sufficiently expert to warrant 1st authorship  - faculty and student status should not influence authorship  -student should be 1st author from master thesis | 5±1 vs. 4±2  6±1 vs. 5±2  5±2 vs. 4±2 |
| Social sciences | Meyer, 200468 | Editorial members of accounting journals and young accounting faculty members in USA | Perceived behaviour appropriateness/ behaviour occurrence/ actual knowledge of occurrence of co-authorship issues:h  - professors uses graduate students to do literature review, data collection and analysis but does not acknowledge  - professor agrees to chair dissertation only if joint authorship  - professor uses parts of graduate student work for his paper without acknowledgment  - major professor appears as senior (first) author on a manuscript from dissertation | 2.5/5.0/2.0  3.2/4.5/1.7  1.6/4.8/1.7  2.7/4.5/1.6 |
| Health | Szirony, 200470 | Nursing faculty members in USA | Opinion that it is unethical vs. questionable practice of thesis advisor when student leaves and no communication possible regarding manuscript:  - to write and submit article with advisor first and student second author  -to write and submit article with student first and advisor second author  - to write article with help of department chair and submit it with student, advisor and chair as authors | 72.4% vs. 21.6%  61.8% vs. 30.9%  62.9% vs.26.5% |
| Opinion that it is unethical vs. questionable to deny authorship and grant only acknowledgement to a paid graduate student who completes data analysis and help write results and creates some tables in manuscript | 21.4% vs. 27.6% |
| Social sciences | Apgar, 200571 | Members of Society for Social Work and Research in USA | Ethical/undecided/unethical to:  - co-author article with current student  - independently write article or develop study using student’s idea  - assume first authorship on article written by student | 91%/7%/2%  8%/31%/61%  5%/10%/85% |
| Attitudinal differences:i  - women less likely to think that using student’s idea was ethical  - teachers less likely then researchers to be undecided about being first author on paper written by student | odds=0.27  odds=0.18 |
| Social sciences | Sandler, 200578 | APA members and students with a publication from student-faculty collaboration in USA | Involvement in a perceived unethical or unfair authorship assignment:  - total  - men vs. women (P=0.02)  - nontenured vs. tenured (P<0.001)  - number (mean±SD) of perceived incidents: men. vs. women (P<0.001) | 27.3%  37.0% vs. 63.0%  40.7% vs. 59.3%  21.5±19.8 vs. 13.6±12.9 |
| Why unfair (>10% positive response):  - someone/student/faculty received too much or some credit  - someone/student received too much or some credit | 25.9%/23.4%/17.9%  13.9%/13.9% |
| Why not reported (> 10% positive response):  - fear of negative consequences  - respondent instigated event  - incident did not reach level of importance | 25.4%  11.4%  10.9% |
| Natural sciences | Weltzin, 200688 | Participants of ecology meeting in USA | Opinion on first authorship for:  - student who collaborates in all aspects of research with a professor and writes the manuscript  - researcher who develops the idea, receives grant, and technician collects data and supervises student who assist with data collections  - professor/student who collaborate together in ideas, research and writing, and professor does final revision and submits manuscript | 84%  78%  46%/46% |
| Social sciences | Geelhoed, 200791 | Authors of articles in clinical psychology journals | Opinion of students vs. faculty on influences on authorship decision making (P<0.05):  - differences in power influence authorship  - perceived less power than other authors (mean±SD)j | 38.5% vs. 14.1%  2.5±1.4 vs. 3.3±1.2 |
| Social sciences | Tryon, 200798 | Doctoral students in school psychology in USA | Different opinions (mean score±SD, scale range 1-6) on:  - developing dissertation idea  desirable to be student vs. advisor  ethical to be student vs. advisor  - to be first or sole author  desirable to be student vs. advisor  desirable to be student vs. advisor | 5.2±1.4 vs. 4.7±1.1  5.6±1.1 vs. 4.9±1.3  4.9±1.8 vs. 2.1±1.5  4.3±1.8 vs. 1.9±1.4 |
| Natural sciences | Picard, 2010124 | Students and supervisors from agriculture school in Australia | No. agreeing with authorship statements – students (n=19) vs. professors (n=18):  - if you work for an article, you can expect authorship  - if students plans publication, supervisor would expect co-authorship  - on co-authored paper from thesis, supervisor decides on first author  - assistance with writing and editing merits authorship  - supervisor should help student write thesis or papers | 14 vs. 12  3 vs. 5  3 vs. 3  3 vs. 3  4 of 11 vs. 11 of 17 |
| Social sciences | Welfare, 2010130 | Students and faculty from US universities with graduate studies in education | Opinion of students vs. faculty for common practices (P<0.05):  - professor sole author when paid student helps collect and enter data  - professor sole author when paid student helps collect, enter and analyze data, writes literature review  - professor sole author when paid student conduct and transcribes interviews, code data  - professor sole author when student has idea, work together on all other parts of research and writing  - student sole author when student does project as class assignment and professor helps with editing  - student sole author when completes thesis and professor gives guidance  - professor sole author when paid student finds literature and write overview and professor revises overview and writes the rest | 66.4% vs. 56.8%  11.1% vs. 4.0%  49.6% vs. 64.6%  2.9% vs. 0.8%  60.5% vs. 57.0%  53.7% vs. 34.5%  40.5% vs. 42.8% |
| Opinion of students vs. faculty for recommended practices (P<0.05):  - processor sole author when paid student helps collect, enter and analyze data and professor writes manuscript  - professor sole author when paid student helps collect, enter and analyze data, writes literature review  - student sole author when student has idea, work together on all other parts of research and writing  - student sole author when completes thesis and professor gives guidance  - professor sole author when paid student finds literature and write overview and professor revises overview and writes the rest | 8.8% vs. 12.7%  1.8% vs. 0.8%  5.6% vs. 2.6%  59.6% vs. 49.2%  13.8% vs. 24.5% |
| For all scenarios, recommended authorship was greater than perceived practice | P<0.01 |
| Students’ opinion of importance higher than professors’ for:  - collecting qualitative data  - entering data into statistical programme  - analyzing the data  - writing literature review/introduction section  - writing methods section  - total time spent on project | P≤0.05 for all contributions |

*Abbreviations: CI, confidence interval; SD, standard deviation; SE, standard error; APA, American Psychological Association.

aPartial or full replication or modification of questionnaire by Spiegel and Keith Spiegel, 1970.11

bAgreement with other health professionals from the study (dentistry, medicine, pharmacy, social work).

cFaculty with higher academic rank or more teaching time gave students more credit (r=0.16, P<0.05, r=0.20, P<0.01, respectively); faculty assigned more credit to students that students did and students assigned more credit to the advisor then the faculty (F(1,418)=25.96, P<0.001; 3-way ANOVA).

dNo numerical results presented.

eOn a scale from 1 (highly unethical) to 7 (highly ethical).

fOn a scale from least (1) to most (7) likelihood, effectiveness and possibility of negative consequences.

gOn a scale from 1 (strongly disagree) to 7 (strongly agree); only statistically significant results presented.

hOn a scale from 1 (not appropriate or never) to 9 (entirely appropriate or often) for appropriateness or behaviour occurrence; and from 1 (no firsthand knowledge) to 4 (often observed). SD is not presented as they were reported with averages only for behaviour appropriateness.

iMultinomial logit analysis; P<0.05 for gender and P<0.0 for teaching vs. research.

jScale range of the Likert scale not reported.
